# Supplementary material
Source: PubMed Central journal article supplement (PMC5860266)
Supplement: DB161310SupplementaryData.pdf [file DB161310SupplementaryData.pdf]

SUPPLEMENTARY DATA

**Supplementary Table 1. Time domain parameters of heart rate variability during hypoglycemia and euglycemia**

Data are Mean±SD. EU – euglycemia; HYPO – hypoglycemia; SDNN – standard deviation of NN; RMSSD – root mean square of successive differences in NN

**DM**

|                   | Time (min)  | 0         | 30        | 60        | 90        | 120       |
|-------------------|-------------|-----------|-----------|-----------|-----------|-----------|
| <b>SDNN (ms)</b>  | <b>EU</b>   | 33.0±12.5 | 29.1±12.6 | 29.1±13.0 | 29.4±14.5 | 29.2±12.9 |
|                   | <b>HYPO</b> | 31.0±14.9 | 33.9±16.8 | 30.3±14.7 | 34.0±18.1 | 40.4±26.9 |
| <b>RMSSD (ms)</b> | <b>EU</b>   | 18.6±9.7  | 15.6±8.2  | 15.6±6.9  | 17.7±11.4 | 16.8±7.7  |
|                   | <b>HYPO</b> | 20.0±13.0 | 19.6±14.2 | 15.0±8.2  | 16.2±13.4 | 22.9±22.2 |

**nonDM**

|                   | Time (min)  | 0         | 30        | 60        | 90        | 120       |
|-------------------|-------------|-----------|-----------|-----------|-----------|-----------|
| <b>SDNN (ms)</b>  | <b>EU</b>   | 48.7±19.7 | 61.8±27.7 | 53.2±19.1 | 53.7±10.8 | 59.3±23.4 |
|                   | <b>HYPO</b> | 55.9±26.7 | 57.6±16.2 | 47.1±17.4 | 51.0±19.7 | 59.2±40.4 |
| <b>RMSSD (ms)</b> | <b>EU</b>   | 30.6±18.2 | 33.3±16.0 | 32.0±15.8 | 28.9±10.8 | 30.9±12.4 |
|                   | <b>HYPO</b> | 35.0±18.9 | 34.1±17.3 | 28.7±17.4 | 33.7±21.2 | 36.0±36.2 |

SUPPLEMENTARY DATA

**Supplementary Table 2. Respiratory frequencies during heart rate variability recordings**

Respiratory frequencies (Hz) Mean±SD during euglycemic and hypoglycemic clamp studies in diabetic (DM) and nondiabetic (nonDM) groups

| <b>Time (min)</b> |             | 0         | 30        | 60        | 90        | 120       |
|-------------------|-------------|-----------|-----------|-----------|-----------|-----------|
| <b>DM</b>         | <b>EU</b>   | 0.25±0.05 | 0.27±0.07 | 0.26±0.05 | 0.29±0.06 | 0.24±0.05 |
|                   | <b>HYPO</b> | 0.25±0.06 | 0.25±0.07 | 0.26±0.08 | 0.31±0.06 | 0.29±0.05 |
| <b>NonDM</b>      | <b>EU</b>   | 0.24±0.03 | 0.25±0.05 | 0.24±0.04 | 0.26±0.05 | 0.26±0.07 |
|                   | <b>HYPO</b> | 0.24±0.04 | 0.26±0.04 | 0.27±0.06 | 0.30±0.08 | 0.27±0.08 |
